1 **Diet-induced obese mice are resistant to improvements in cardiac function**  
2 **resulting from short-term adropin treatment**

3

4 Dharendra Thapa<sup>1,2,3,#,\$</sup>, Bingxian Xie<sup>1,2,3,4,#</sup>, Bellina A.S. Mushala<sup>1,2,3</sup>, Manling  
5 Zhang<sup>1,2,3</sup>, Janet R. Manning<sup>1,2,3</sup>, Paramesha Bugga<sup>1,2,3</sup>, Michael W. Stoner<sup>1,2,3</sup>,  
6 Michael J. Jurczak<sup>2,3,4</sup>, Iain Scott<sup>1,2,3,\*</sup>

7

8 <sup>1</sup> Division of Cardiology, <sup>2</sup> Center for Metabolism and Mitochondrial Medicine, <sup>3</sup>  
9 Vascular Medicine Institute, and <sup>4</sup> Division of Endocrinology and Metabolism,  
10 Department of Medicine, University of Pittsburgh, Pittsburgh, PA

11

12 <sup>\$</sup> Current address: Department of Exercise Physiology, School of Medicine, West  
13 Virginia University, Morgantown, WV

14

15 <sup>#</sup> These authors contributed equally to this work

16

17 <sup>\*</sup> Address for correspondence

18 Iain Scott, PhD, FAHA, FCVS

19 Division of Cardiology

20 Department of Medicine

21 University of Pittsburgh

22 BST E1259

23 200 Lothrop Street

24 Pittsburgh, PA 15261

25 [iain.scott@pitt.edu](mailto:iain.scott@pitt.edu)

26 +1 (412)-648-7691

27

28 **Keywords:** Adropin; Cardiac Function; High Fat Diet; Mice; Contractility; Insulin

29 **Running Title:** Acute adropin treatment and obesity

30 **Word Count:** 2731

31 **Figures:** 6

32 **ABSTRACT**

33

34 Previous studies have shown that treatment with recombinant adropin, a  
35 circulating peptide secreted by the liver and brain, restores glucose utilization in  
36 the hearts of diet-induced obese mice. This restoration of fuel substrate flexibility,  
37 which is lost in obese and diabetic animals, has the potential to improve  
38 contractile function in the diabetic heart. Using an *ex vivo* approach, we  
39 examined whether short-term adropin treatment could enhance cardiac function  
40 in a mouse model of diet-induced obesity. Our study showed that acute adropin  
41 treatment reduces inhibitory phosphorylation of pyruvate dehydrogenase in  
42 primary neonatal cardiomyocytes, and leads to moderate improvements in *ex*  
43 *vivo* cardiac function in mice fed a low fat diet. Conversely, short-term exposure  
44 to adropin led to a small decrease in cardiac function in mice fed a long-term high  
45 fat diet. Insulin treatment did not significantly alter cardiac function in adropin  
46 treated hearts from either low or high fat diet mice, however acute adropin  
47 treatment did moderately restore downstream insulin signaling in high fat diet fed  
48 mice. Overall, these data suggest that in an *ex vivo* setting, acute adropin  
49 treatment alone is not sufficient to promote improved cardiac function in obese  
50 animals.

## 51 INTRODUCTION

52

53 Adropin is a short circulating peptide hormone produced in the liver and brain  
54 (Kumar et al., 2008). Once cleaved from its propeptide form, circulating adropin  
55 regulates metabolic function in a number of tissues, including the liver, brain,  
56 skeletal muscle, and the cardiovascular system (see, e.g., Kumar et al. 2008;  
57 Lovren et al., 2010; Gao et al., 2014; Gao et al., 2015; Stein et al., 2016; Thapa  
58 et al., 2019; Altamimi et al., 2019). Early studies demonstrated that long-term  
59 exposure to a high fat diet in mice resulted in decreased levels of circulating  
60 adropin (Kumar et al., 2008). Subsequent studies from the same group showed  
61 that restoration of adropin levels in diabetic mice, using either transgenic over-  
62 expression or treatment with recombinant peptide, led to a reversal in  
63 hyperglycemia, and the restoration of glucose oxidation in formerly insulin-  
64 resistant tissues such as skeletal muscle (Gao et al., 2014; Gao et al., 2015).

65

66 The ability of adropin to restore glucose oxidation in striated muscle from diabetic  
67 animals raised the possibility that it may have a beneficial effect on cardiac  
68 function in models of diabetic cardiomyopathy. While previous studies have  
69 shown that adropin can indeed improve glucose utilization in the hearts of both  
70 lean and diet-induced obese mice (Altamimi et al., 2019; Thapa et al., 2019), its  
71 effect on cardiac contractile function in obese animals remains unclear. In this  
72 study, we used an *ex vivo* isolated working heart approach to determine whether  
73 acute adropin treatment would improve cardiac functional parameters in the  
74 hearts of both lean and obese mice. Our studies demonstrate that while short-  
75 term adropin improves cardiac function in lean mice *ex vivo*, it has a small  
76 negative effect on cardiac contractile function in diet-induced obese mice. This  
77 lack of improvement may be the result of impaired insulin signaling in *ex vivo*  
78 hearts from obese mice, which is only moderately improved in adropin-treated  
79 animals fed a long-term high fat diet.

## 80 **METHODS**

81

### 82 Animal Husbandry and Use

83

84 Animals were housed in the University of Pittsburgh animal facility under  
85 standard conditions with *ad libitum* access to water and food on a constant 12h  
86 light/12h dark cycle. Male control and diet-induced obese C57BL/6J mice were  
87 obtained from The Jackson Laboratory after 22 weeks of either standard low fat  
88 diet (LFD; 70% carbohydrate, 20% protein, 10% fat; Research Diets D12450B),  
89 or a high fat diet (HFD; 20% carbohydrate, 20% protein, 60% fat; Research Diets  
90 D12492). Mice were maintained on this diet at the University of Pittsburgh for two  
91 weeks to acclimatize after transport prior to experimental use. At the end of 24  
92 week LFD or HFD feeding regimens, mice received three I.P. injections of either  
93 vehicle (sterile PBS) or adropin (450 nmol/kg) over two days on a schedule  
94 described in Figure 2. After the second injection, mice were fasted overnight with  
95 free access to water. After the third injection, mice were euthanized and hearts  
96 rapidly excised for experimental use. Experiments were conducted in compliance  
97 with National Institutes of Health guidelines, and followed procedures approved  
98 by the University of Pittsburgh Institutional Animal Care and Use Committee.

99

### 100 Neonatal Cardiomyocyte Isolation

101

102 Neonatal cardiomyocytes were isolated by collagenase disassociation from  
103 hearts obtained from P1-P3 rats. Cells were pre-plated to remove non-  
104 cardiomyocyte cells, and purified cardiomyocytes were seeded on collagen  
105 plates for 48 hours prior to experimental use. Cells were treated with vehicle  
106 (PBS) or adropin (0.5  $\mu$ g/mL) for 24 hours, and then harvested for biochemical  
107 analysis.

108

### 109 Protein Isolation and Western Blotting

110

111 Cardiac tissues were minced and lysed in CHAPS buffer (1% CHAPS, 150 mM  
112 NaCl, 10 mM HEPES, pH 7.4) on ice for ~2 hours. Homogenates were spun at  
113 10,000 *g*, and supernatants collected for western blotting. Protein lysates were  
114 prepared in LDS sample buffer, separated using SDS/PAGE 4-12% or 12% Bis-  
115 Tris gels, and transferred to nitrocellulose membranes. Protein expression was  
116 analyzed using the following primary antibodies: mouse PDK4 (Abcam, catalog  
117 number ab110336, 1:1000), rabbit PDH (Cell Signaling, catalog number 2784,  
118 1:1000), rabbit phospho-PDH Ser 293 (Cell Signaling, catalog number 31866,  
119 1:1000), rabbit Tubulin (Cell Signaling, catalog number 2125, 1:5000), rabbit AKT  
120 (Cell Signaling, catalog number 9272, 1:1000), rabbit phospho-AKT Ser 473 (Cell  
121 Signaling, catalog number 4060, 1:1000), rabbit GSK-3 $\beta$  (Cell Signaling, catalog  
122 number 9315, 1:1000), rabbit GSK-3 $\beta$  Ser 9 (Cell Signaling, catalog number  
123 5558, 1:1000). Fluorescent anti-mouse or anti-rabbit secondary antibodies (red,  
124 700 nm; green, 800 nm) from Li-Cor were used to detect expression levels.  
125 Protein densitometry was measured using Image J software (National Institutes  
126 of Health, Bethesda, MD).

127

#### 128 Gene Expression Analysis

129

130 RNA was extracted from cells using RNEasy kit (Qiagen). cDNA was generated  
131 with 500 ng-1  $\mu$ g of RNA using Maxima Reverse Transcriptase (ThermoFisher).  
132 Quantitative PCR (qPCR) was performed using SYBR-Green (ThermoFisher)  
133 reagent with primers for *Ppargc1a*, *Cd36*, *Cpt1b*, *Pdk4*, and *Gapdh* (Qiagen).

134

#### 135 Isolated Working Heart Analysis

136

137 Cardiac *ex vivo* function was calculated using a Harvard Apparatus ISHR  
138 isolated working heart system as previously described (Manning et al., 2019).  
139 Hearts from anesthetized mice were rapidly excised and cannulated via the aorta  
140 in warm oxygenated Krebs-Henseleit buffer (118 mM NaCl, 25 mM NaHCO<sub>3</sub>, 0.5  
141 mM Na-EDTA [disodium salt dihydrate], 5 mM KCl, 1.2 mM KH<sub>2</sub>PO<sub>4</sub>, 1.2 mM

142 MgSO<sub>4</sub>, 2.5 mM CaCl<sub>2</sub>, 11 mM glucose). Retrograde (i.e. Langendorff) perfusion  
143 was initiated to blanch the heart, maintained at a constant aortic pressure of 50  
144 mmHg with a peristaltic pump through a Starling resistor. A small incision was  
145 next made in the pulmonary artery to allow perfusate to drain, and the heart was  
146 paced at a rate slightly higher than endogenous (~360-500 bpm). The left atrium  
147 was then cannulated via the pulmonary vein, and anterograde perfusion was  
148 initiated with a constant atrial pressure of 11 mmHg against an aortic workload of  
149 50 mmHg. Left ventricle pressure was measured via Mikro-tip pressure catheter  
150 (Millar) carefully inserted into the LV through the aorta. The work-performing  
151 heart was permitted to equilibrate for 30 minutes to establish baseline functional  
152 parameters. After baseline measurements were completed, hearts were exposed  
153 to 0.1 U/L insulin for 10 minutes, after which hearts were either used for  
154 measurements of insulin-stimulated cardiac function, or snap-frozen for  
155 biochemical analyses. Mouse hearts that failed to equilibrate and/or function after  
156 cannulation were excluded from the working heart analysis.

157

#### 158 Statistical Analysis

159

160 Graphpad Prism software was used to perform statistical analyses. Means ±  
161 SEM were calculated for all data sets. Data were analyzed using either one-way  
162 or two-way ANOVA with Dunnett's post-hoc multiple comparison testing to  
163 determine differences between treatment and feeding groups. Data were  
164 analyzed with two-tailed Student's T-Tests to determine differences between  
165 single variable groups.  $P < 0.05$  was considered statistically significant.

## 166 **RESULTS**

167

### 168 Adropin treatment reduces Pdk4 gene expression and inhibitory PDH 169 phosphorylation in neonatal cardiomyocytes

170

171 We first examined the impact of adropin treatment on metabolic gene expression  
172 in primary neonatal cardiomyocytes. Exposure to adropin for 24 hours had no  
173 discernable effect on the expression of genes involved in fatty acid oxidation,  
174 including *Ppargc1a*, *Cd36*, and *Cpt1b* (Figure 1A-C). In contrast, *Pdk4* gene  
175 expression, a negative regulator of pyruvate dehydrogenase (PDH) activity, was  
176 significantly decreased by exposure to adropin (Figure 1D). The decrease in  
177 *Pdk4* gene expression resulting from adropin treatment was matched at the  
178 protein level (Figure 1E), which led to a significant decrease in inhibitory PDH  
179 phosphorylation at Ser 293. Based on these results, we conclude that adropin  
180 treatment is likely to improve glucose utilization in cardiomyocytes under normal  
181 nutrient conditions, in concordance with previous studies in H9c2 cells (Thapa et  
182 al., 2018) and mouse hearts (Altamimi et al., 2019).

183

### 184 Exposure to a long-term high fat limits improvements in cardiac function driven 185 by acute adropin treatment

186

187 We previously demonstrated that acute adropin treatment allows insulin-  
188 resistant, pre-diabetic mouse hearts to resume the use of glucose as a fuel  
189 substrate (Thapa et al., 2019). However, this study did not address whether  
190 improved glucose use led to improvements in cardiac contractility and workload.  
191 Therefore, we next examined whether a short-term adropin treatment regimen  
192 (Figure 2A) would result in increased cardiac function using an *ex vivo* isolated  
193 working heart approach. After 24 weeks of a high fat diet (HFD), there was an  
194 increase in body weight that was not affected by short-term adropin treatment  
195 (Figure 2B-C). At the end of the HFD exposure, there was a minor increase in  
196 contractility in vehicle-treated mice relative to their low fat diet (LFD) controls,

197 along with a trend towards increased relaxation and cardiac output (Figure 3A-  
198 D). As shown previously by Altamimi et al. (2019), short-term adropin treatment  
199 led to an increase in all functional parameters (contractility, relaxation, workload,  
200 and output) in LFD mice (Figure 3A-D). In contrast, treatment of HFD mice with  
201 adropin led to a moderate decrease in cardiac function across the group relative  
202 to their vehicle-treated controls (Figure 3A-D). Based on these results, we  
203 conclude that acute adropin exposure in obese mice, in an *ex vivo* context, leads  
204 to an unexpected decrease in cardiac function.

205

206 Insulin stimulation does not restore improvements in cardiac function after acute  
207 adropin treatment in high fat diet-exposed mice

208

209 Insulin stimulation leads to a shift towards glucose oxidation in adropin-treated  
210 lean mice (Altamimi et al., 2019) *ex vivo*, and in obese mice under  
211 hyperinsulinemic-euglycemic clamp conditions *in vivo* (Thapa et al., 2019).  
212 Therefore, we examined whether insulin stimulation would reverse the loss of  
213 cardiac function in adropin-treated mice using our isolated working heart  
214 approach. In LFD mice, insulin stimulation of adropin treated animals again  
215 resulted in a moderate average increase in cardiac functional parameters (Figure  
216 4A-D). However, the ability of insulin to drive glucose oxidation in the hearts of  
217 HFD adropin-treated mice did not result in improved cardiac contractility or output  
218 (Figure 4A-D). Based on these results, we conclude that insulin stimulation is not  
219 sufficient to restore contractility in adropin-treated HFD mouse hearts *ex vivo*.

220

221 Acute adropin treatment moderately improves cardiac insulin signaling in high fat  
222 diet-exposed mice

223

224 In lean mice, adropin treatment leads to an increase in cardiac insulin sensitivity,  
225 as measured by the induction of cellular signaling pathways (Altamimi et al.,  
226 2019). To understand if exposure to a HFD was blocking the ability of adropin to  
227 induce insulin signaling pathways, we first examined AKT activation in hearts



228 from lean and obese mice after insulin exposure. In vehicle-treated LFD mice,  
229 insulin stimulation led to a significant increase in AKT activation, as measured by  
230 phosphorylation at Ser 473 (Figure 5A). However, in both vehicle- and adropin-  
231 treated HFD mice, there was no significant induction of AKT signaling after  
232 insulin exposure (Figure 5A). We next examined insulin signaling downstream of  
233 AKT, by measuring phosphorylation of GSK-3 $\beta$  at Ser 9. As with AKT, insulin  
234 exposure led to a significant induction of GSK-3 $\beta$  phosphorylation in vehicle-  
235 treated LFD mice (Figure 5B). While vehicle-treated HFD mice showed no  
236 response to insulin (in keeping with AKT, above), adropin-treated HFD mice  
237 displayed a significant increase in GSK-3 $\beta$  phosphorylation at Ser 9 (Figure 5B).  
238 Based on these results, we conclude that acute adropin treatment has a  
239 moderate positive effect on downstream insulin signaling in obese mice.

## 240 **DISCUSSION**

241

242 In keeping with previous studies, we show that short-term adropin treatment  
243 reduces inhibitory phosphorylation of PDH in primary cardiomyocytes *in vitro*,  
244 and increases overall cardiac function in the hearts from lean mice *ex vivo*. For  
245 the first time, we show that acute adropin treatment has a small detrimental effect  
246 on cardiac function in obese mouse hearts, when examined in an *ex vivo* context.  
247 Furthermore, we show that while adropin treatment can moderately improve  
248 downstream insulin signaling in mice fed a high fat diet, it does not restore  
249 proximal insulin signaling through AKT.

250

251 Studies on the role of adropin in cardiac energy metabolism were prompted by  
252 reports of its function in skeletal muscle. Elegant work by the Butler group  
253 demonstrated that acute adropin treatment downregulated genes involved in fatty  
254 acid oxidation, reduced inhibitory PDH phosphorylation via reductions in *Pdk4*  
255 expression, and restored insulin signaling in the skeletal muscle of diet-induced  
256 obese mice (Gao et al., 2014; Gao et al., 2015). Importantly, in addition to  
257 showing that acute adropin treatment reduced whole-body hyperglycemia, they  
258 used indirect calorimetry to show that adropin shifted oxidation preferences from  
259 fat to glucose in obese mice (Gao et al., 2015). Follow-up studies in the heart  
260 demonstrated that all of these same metabolic pathways were operable, and that  
261 acute adropin treatment could promote glucose utilization in the hearts of both  
262 lean and obese mice (Altamimi et al., 2019; Thapa et al., 2019).

263

264 While cardiac function was improved by acute adropin treatment in lean mice *ex*  
265 *vivo* (Altamimi et al., 2019), its effect on the obese mouse heart is less clear.  
266 Thapa et al. (2019) showed that three days of adropin treatment had little effect  
267 on systolic function, with a non-significant trend towards improved diastolic  
268 function in adropin-treated obese mice *in vivo*. Our findings in this study suggest  
269 that acute adropin exposure in mice exposed to a long-term HFD is moderately  
270 detrimental in terms of cardiac function when measured *ex vivo* (Figures 3,4).

271 The mechanism underlying this decrease in function is unclear, but may be the  
272 result of several factors. Firstly, this short-term adropin treatment did not fully re-  
273 establish insulin signaling in the HFD mouse hearts (Figure 5), which may have  
274 left these hearts mildly energy starved relative to their LFD controls. However,  
275 while the perfusate contained only glucose, isolated working hearts from rodents  
276 can maintain fatty acid oxidation from endogenous triglyceride pools for at least  
277 60 minutes (Saddik and Lopaschuk, 1991), suggesting that energy supply *per se*  
278 may not be the main cause of functional decline. Secondly, the adropin treatment  
279 regimen used here (three injections over two days) was shorter than our previous  
280 *in vivo* studies (five injections over three days; Thapa et al., 2019), and this may  
281 have abrogated its biological response. Thirdly, the isolated working heart model  
282 used necessarily operates in the absence of neurohormonal stimulation  
283 (reviewed in Ghionzoli et al. 2021), and our understanding of the interplay  
284 between adropin and other hormonal regulators of cardiac function remains  
285 incomplete. Finally, previous studies in non-diabetic failing hearts have shown  
286 that blocking cardiac glucose uptake via insulin resistance may be  
287 cardioprotective, by preventing glucotoxicity from incomplete glucose metabolism  
288 (Taegtmeyer et al., 2013). While the short-term switch to increased glucose use  
289 driven by adropin treatment may potentiate such a response, this may be viewed  
290 as a less likely outcome, as glucose oxidation appears to be complete in both  
291 lean and obese mice after adropin treatment (Altamimi et al., 2019; Thapa et al.,  
292 2019).

293

294 To address these questions, future work will need to focus on two main factors.  
295 Firstly, given the uncertainty surrounding potential lack of neurohormonal  
296 stimulation, further *in vivo* studies of cardiac fuel metabolism and function will  
297 need to be performed in both lean and obese mice after adropin treatment.  
298 Secondly, given that structural changes (dilation, hypertrophy, etc.) may occur  
299 after extended periods of high fat feeding in mice, it is unlikely that a short-term  
300 adropin treatment regimen will be sufficient to reverse these outcomes. As such,

301 future studies will need to examine whether long-term adropin replacement is  
302 required to improve cardiac functional outcomes in obese and diabetic animals.

303 **FUNDING**

304

305 This work was supported by: NIH/NHLBI K99/R00 award (HL146905) to DT;  
306 NIGMS T32 award (GM133332) to B.A.S.M; and NIH/NHLBI R01 awards  
307 (HL132917 & HL147861) to IS. The University of Pittsburgh Center for  
308 Metabolism and Mitochondrial Medicine (C3M) is supported by a Pittsburgh  
309 Foundation award (MR2020 109502) to MJJ.

310 **AUTHOR CONTRIBUTIONS**

311

312 DT, BX, MJJ, and IS designed the experiments. DT, BX, MZ, MWS, and JRM  
313 performed the experiments. DT, BX, and IS analyzed the data. IS produced the  
314 figures. PB and BASM provided critical input into the manuscript and discussion.  
315 DT and IS wrote and edited the manuscript.

316 **DISCLOSURES**

317

318 None.

319 **REFERENCES**

320

321 Altamimi TR, Gao S, Karwi QG, Fukushima A, Rawat S, Wagg CS, Zhang L,  
322 Lopaschuk GD. Adropin regulates cardiac energy metabolism and improves  
323 cardiac function and efficiency. *Metabolism*. 2019 Sep;98:37-48. doi:  
324 10.1016/j.metabol.2019.06.005. Epub 2019 Jun 14. PMID: 31202835.

325

326 Gao S, McMillan RP, Jacas J, Zhu Q, Li X, Kumar GK, Casals N, Hegardt FG,  
327 Robbins PD, Lopaschuk GD, Hulver MW, Butler AA. Regulation of substrate  
328 oxidation preferences in muscle by the peptide hormone adropin. *Diabetes*. 2014  
329 Oct;63(10):3242-52. doi: 10.2337/db14-0388. Epub 2014 May 21. PMID:  
330 24848071; PMCID: PMC4171656.

331

332 Gao S, McMillan RP, Zhu Q, Lopaschuk GD, Hulver MW, Butler AA. Therapeutic  
333 effects of adropin on glucose tolerance and substrate utilization in diet-induced  
334 obese mice with insulin resistance. *Mol Metab*. 2015 Jan 17;4(4):310-24. doi:  
335 10.1016/j.molmet.2015.01.005. PMID: 25830094; PMCID: PMC4354928.

336

337 Ghionzoli N, Gentile F, Del Franco AM, Castiglione V, Aimò A, Giannoni A,  
338 Burchielli S, Cameli M, Emdin M, Vergaro G. Current and emerging drug targets  
339 in heart failure treatment. *Heart Fail Rev*. 2021 Jul 17. doi: 10.1007/s10741-021-  
340 10137-2. Epub ahead of print. PMID: 34273070.

341

342 Kumar KG, Trevaskis JL, Lam DD, Sutton GM, Koza RA, Chouljenko VN,  
343 Kousoulas KG, Rogers PM, Kesterson RA, Thearle M, Ferrante AW Jr, Mynatt  
344 RL, Burris TP, Dong JZ, Halem HA, Culler MD, Heisler LK, Stephens JM, Butler  
345 AA. Identification of adropin as a secreted factor linking dietary macronutrient  
346 intake with energy homeostasis and lipid metabolism. *Cell Metab*. 2008  
347 Dec;8(6):468-81. doi: 10.1016/j.cmet.2008.10.011. PMID: 19041763; PMCID:  
348 PMC2746325.

349



350 Lovren F, Pan Y, Quan A, Singh KK, Shukla PC, Gupta M, Al-Omran M, Teoh H,  
351 Verma S. Adropin is a novel regulator of endothelial function. *Circulation*. 2010  
352 Sep 14;122(11 Suppl):S185-92. doi: 10.1161/CIRCULATIONAHA.109.931782.  
353 PMID: 20837912.  
354  
355 Manning JR, Thapa D, Zhang M, Stoner MW, Traba J, McTiernan CF, Corey C,  
356 Shiva S, Sack MN, Scott I. Cardiac-specific deletion of GCN5L1 restricts  
357 recovery from ischemia-reperfusion injury. *J Mol Cell Cardiol*. 2019 Apr;129:69-  
358 78. doi: 10.1016/j.yjmcc.2019.02.009. Epub 2019 Feb 15. PMID: 30776374;  
359 PMCID: PMC6486843.  
360  
361 Saddik M, Lopaschuk GD. Myocardial triglyceride turnover and contribution to  
362 energy substrate utilization in isolated working rat hearts. *J Biol Chem*. 1991 May  
363 5;266(13):8162-70. PMID: 1902472.  
364  
365 Stein LM, Yosten GL, Samson WK. Adropin acts in brain to inhibit water drinking:  
366 potential interaction with the orphan G protein-coupled receptor, GPR19. *Am J*  
367 *Physiol Regul Integr Comp Physiol*. 2016 Mar 15;310(6):R476-80. doi:  
368 10.1152/ajpregu.00511.2015. Epub 2016 Jan 6. PMID: 26739651; PMCID:  
369 PMC4867374.  
370  
371 Taegtmeier H, Beauloye C, Harmancey R, Hue L. Insulin resistance protects the  
372 heart from fuel overload in dysregulated metabolic states. *Am J Physiol Heart*  
373 *Circ Physiol*. 2013 Dec;305(12):H1693-7. doi: 10.1152/ajpheart.00854.2012.  
374 Epub 2013 Oct 4. PMID: 24097426; PMCID: PMC3882545.  
375  
376 Thapa D, Stoner MW, Zhang M, Xie B, Manning JR, Guimaraes D, Shiva S,  
377 Jurczak MJ, Scott I. Adropin regulates pyruvate dehydrogenase in cardiac cells  
378 via a novel GPCR-MAPK-PDK4 signaling pathway. *Redox Biol*. 2018 Sep;18:25-  
379 32. doi: 10.1016/j.redox.2018.06.003. Epub 2018 Jun 9. PMID: 29909017;  
380 PMCID: PMC6008287.

381

382 Thapa D, Xie B, Zhang M, Stoner MW, Manning JR, Huckestein BR, Edmunds  
383 LR, Mullett SJ, McTiernan CF, Wendell SG, Jurczak MJ, Scott I. Adropin  
384 treatment restores cardiac glucose oxidation in pre-diabetic obese mice. *J Mol*  
385 *Cell Cardiol.* 2019 Apr;129:174-178. doi: 10.1016/j.yjmcc.2019.02.012. Epub  
386 2019 Feb 26. PMID: 30822408; PMCID: PMC6486841.

387 **Figure 1**

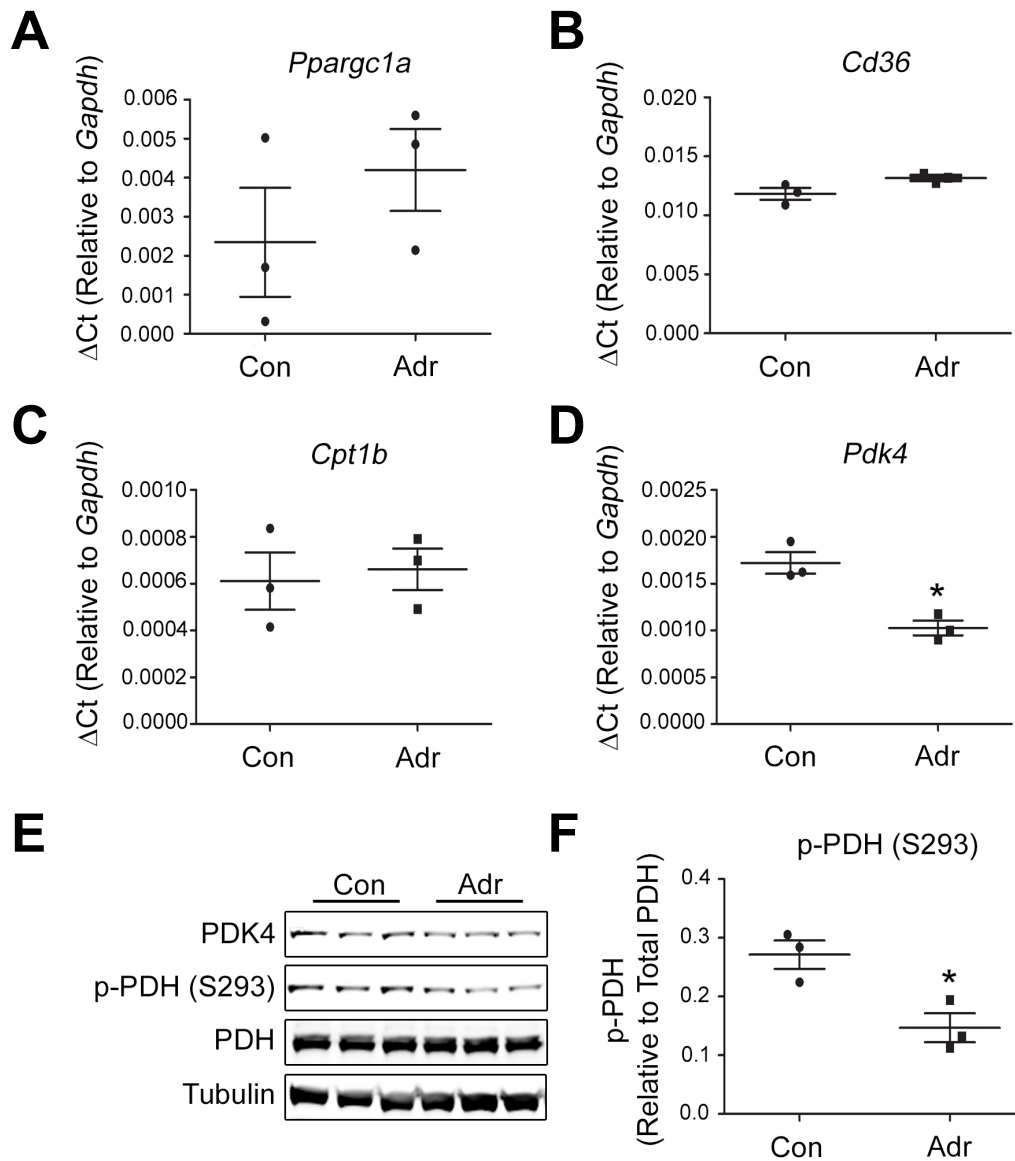

388

389 **Figure 1 – Adropin reduces PDK4 expression and inhibitory PDH**

390 **phosphorylation in rat neonatal cardiomyocytes. (A-D)** Adropin treatment

391 significantly reduced *Pdk4* gene expression in rat neonatal cardiomyocytes

392 without affecting fatty acid oxidation pathway enzymes. **(E-F)** Adropin treatment

393 reduced PDK4 protein expression, leading to significant reductions in inhibitory

394 phosphorylation of pyruvate dehydrogenase (PDH). Con = control, Adr =

395 Adropin. N = 3, \* =  $P < 0.05$  (Student's T-Test).

396 **Figure 2**

**A**

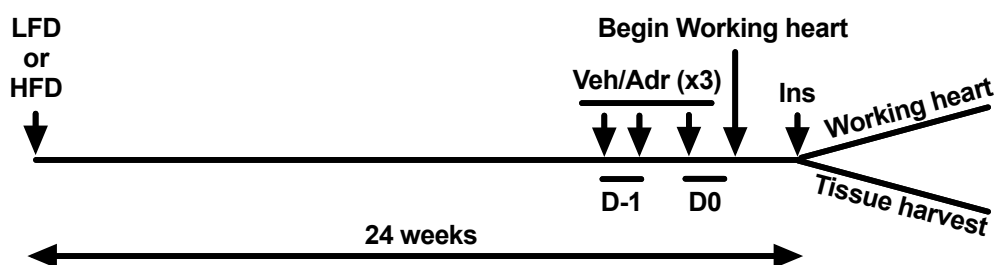

**B**

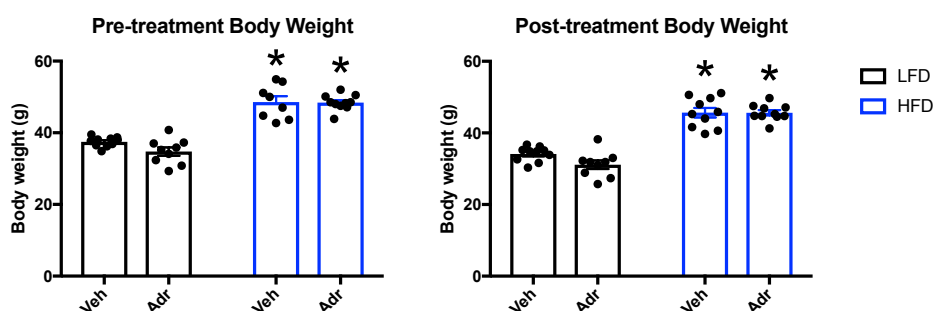

397

398

399 **Figure 2 – Schematic of *in vivo/ex vivo* experimental plan.** (A) Male  
400 C57BL6/J mice aged six weeks were placed on a low fat diet (LFD; 10% fat) or  
401 high fat diet (HFD; 60% fat) for 24 weeks (N = 10 per group). On the day prior to  
402 organ harvest, mice received twice-daily IP injections of either vehicle (Veh;  
403 sterile PBS) or adropin (Adr; 450 nmol/kg in sterile PBS), and were then fasted  
404 overnight. On the morning of experiments, mice received a final IP injection of  
405 Veh or Adr, before hearts were rapidly excised and cannulated for isolated  
406 working heart measurements of cardiac function. After basal functional  
407 parameters were measured, hearts were infused with insulin, and randomly  
408 assigned to either further working heart analysis (N = 5 per group), or  
409 immediately snap-frozen for biochemical analysis (N = 5 per group). (B) Pre- and  
410 Post-treatment body weights of LFD and HFD mice. N = 10, \* =  $P < 0.05$  vs. LFD  
411 Veh group (Two-way ANOVA with Dunnett's Post-Hoc Test).

412 **Figure 3**

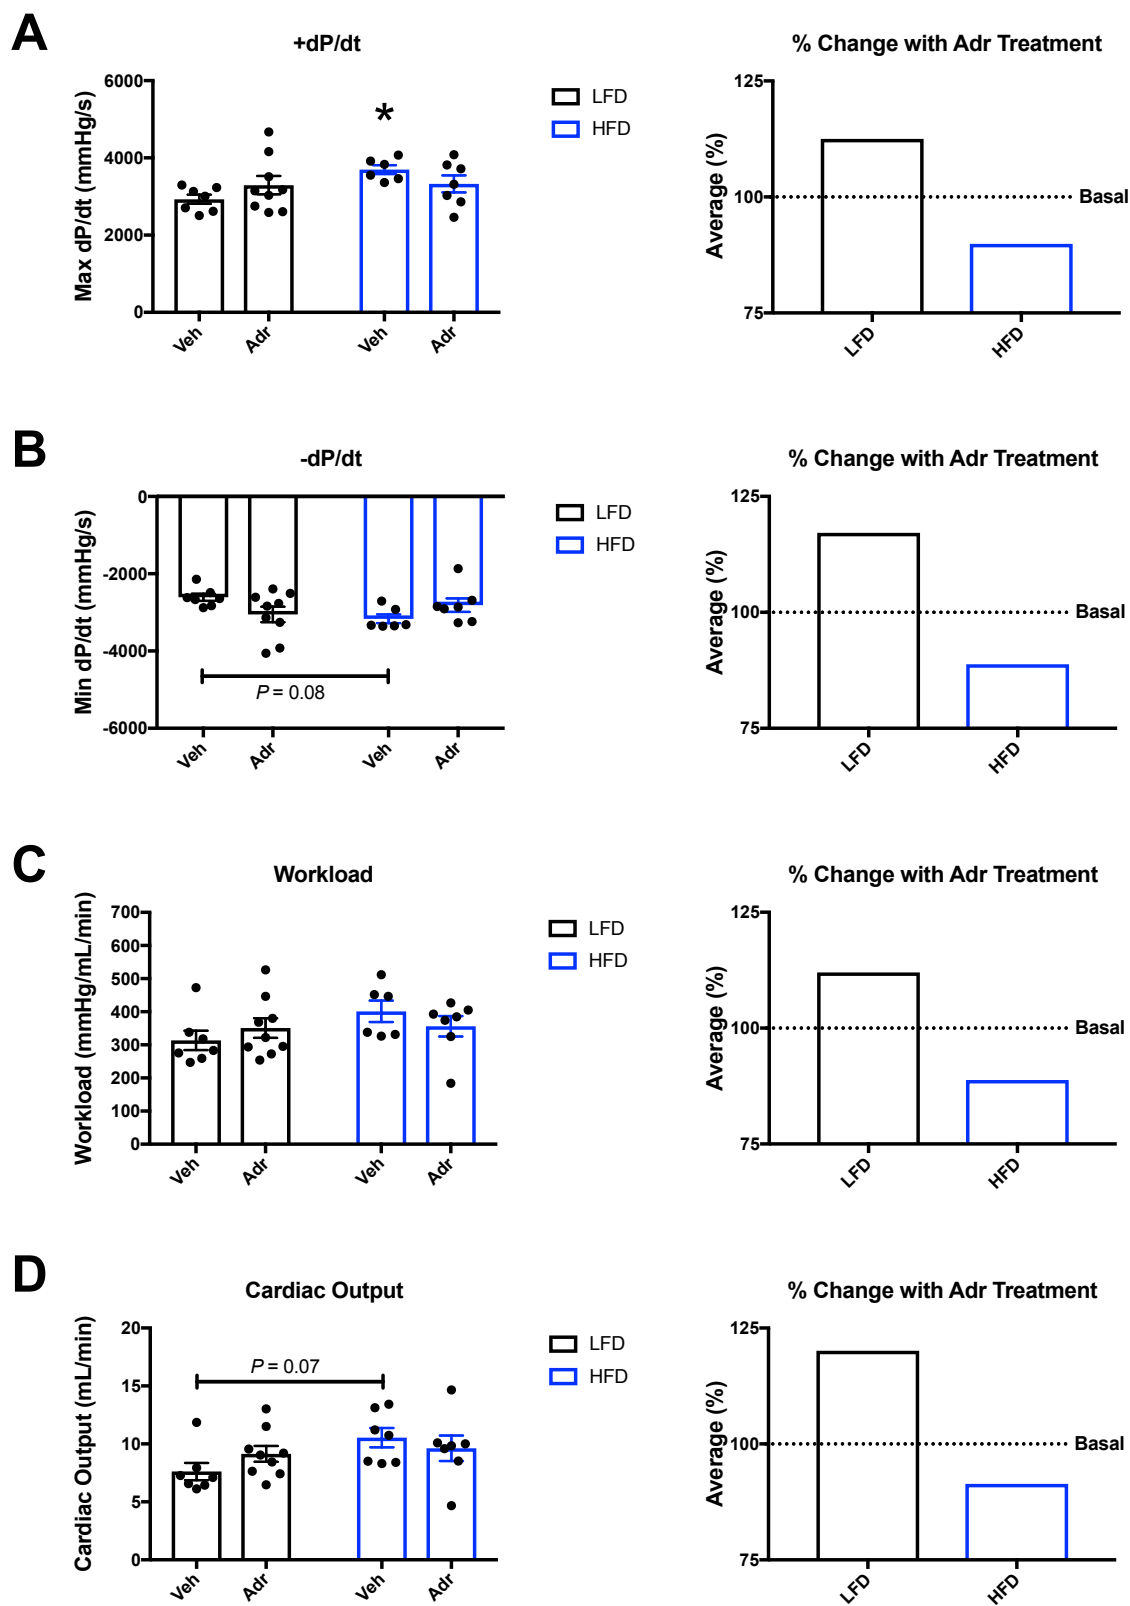

413

414

415 **Figure 3 – Exposure to a high fat diet inhibits adropin-driven improvements**

416 **in cardiac function.** (A-D) Vehicle treated (Veh) mice placed on a high fat diet

417 (HFD) displayed a significant increase in contractility, and trends toward

418 increased relaxation and cardiac output, relative to low fat diet (LFD) controls.

419 Adropin (Adr) treatment in LFD mice led to moderate increases in all cardiac

420 functional parameters, however this effect was reversed in mice exposed to a

421 HFD. N = 6-9, \* =  $P < 0.05$  vs. LFD Veh group (Two-way ANOVA with Dunnett's

422 Post-Hoc Test).

423 **Figure 4**

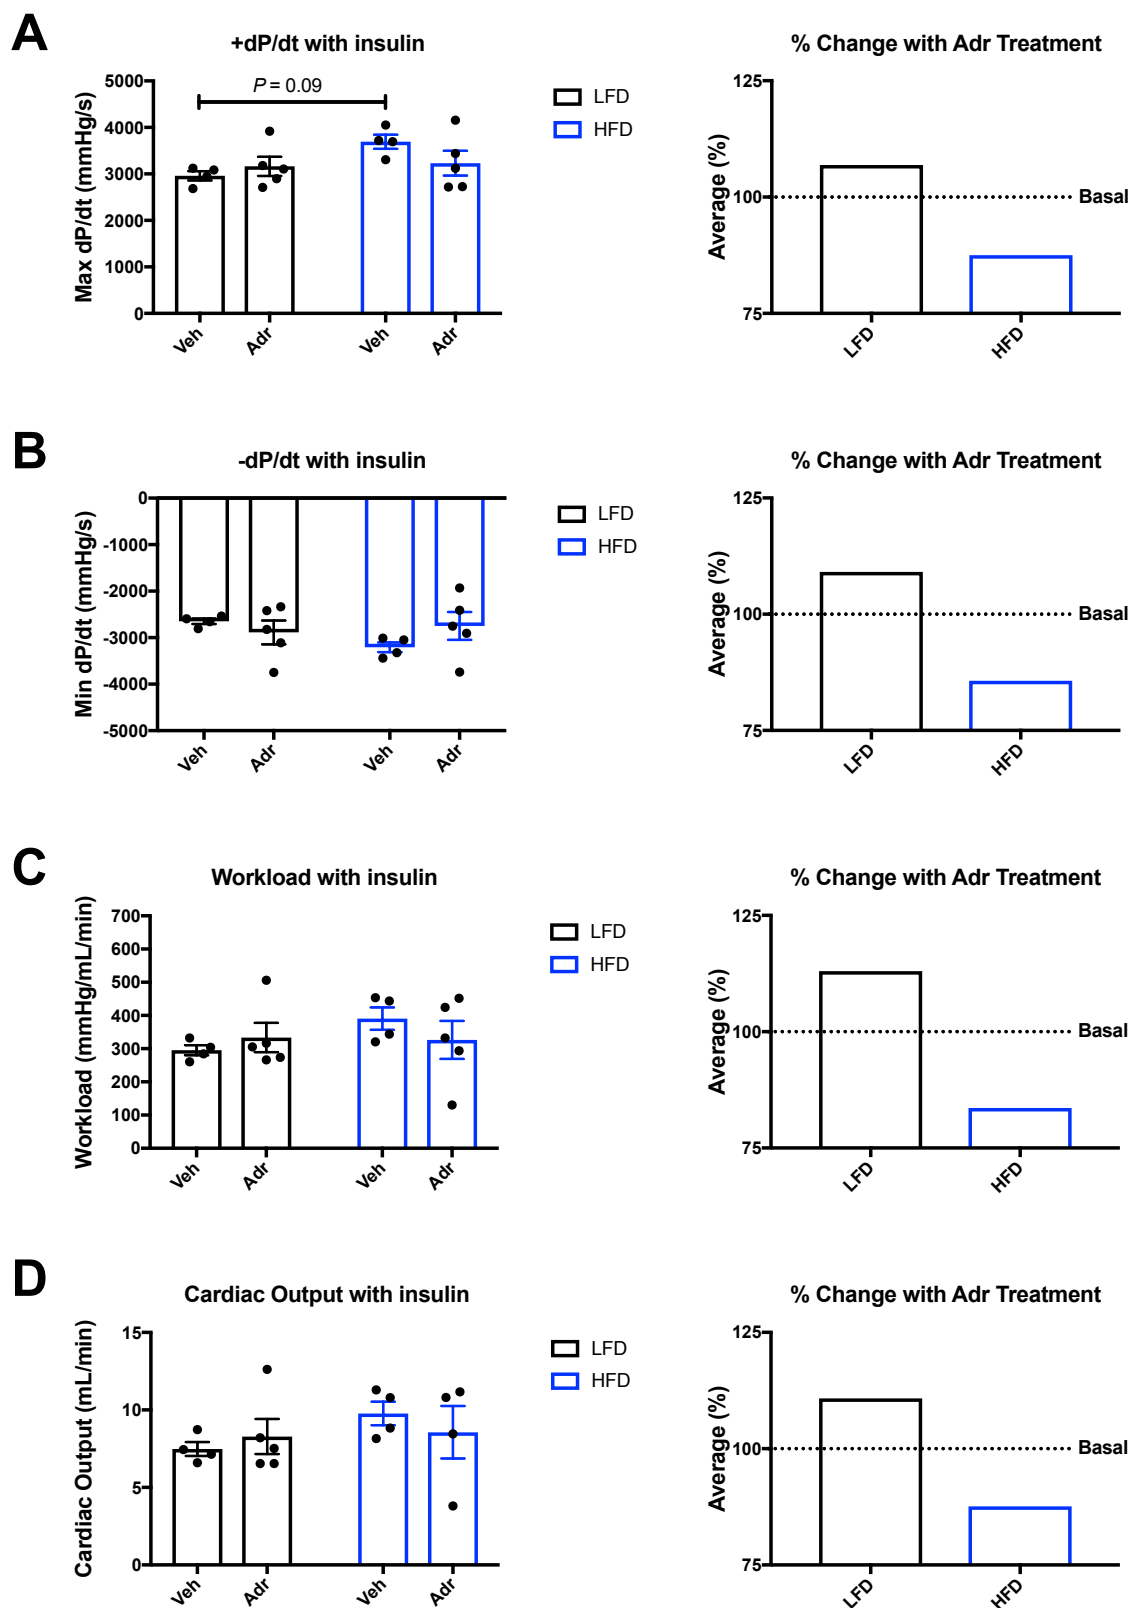

424

425

426 **Figure 4 – Insulin exposure does not reverse the loss of adropin-driven**  
427 **improvements in cardiac function in mice exposed to a high fat diet. (A-D)**

428 As in the unstimulated state (Figure 3), mice on a low fat diet (LFD) displayed  
429 moderate increases in cardiac functional outcomes after insulin stimulation  
430 following acute adropin (Adr) treatment. Conversely, mice exposed to a high fat  
431 diet (HFD) displayed decreased cardiac function in response to insulin  
432 stimulation after acute adropin treatment. N = 4-5, \* =  $P < 0.05$  vs. LFD Vehicle  
433 (Veh) group (Two-way ANOVA with Dunnett's Post-Hoc Test).

434



435

436 **Figure 5**

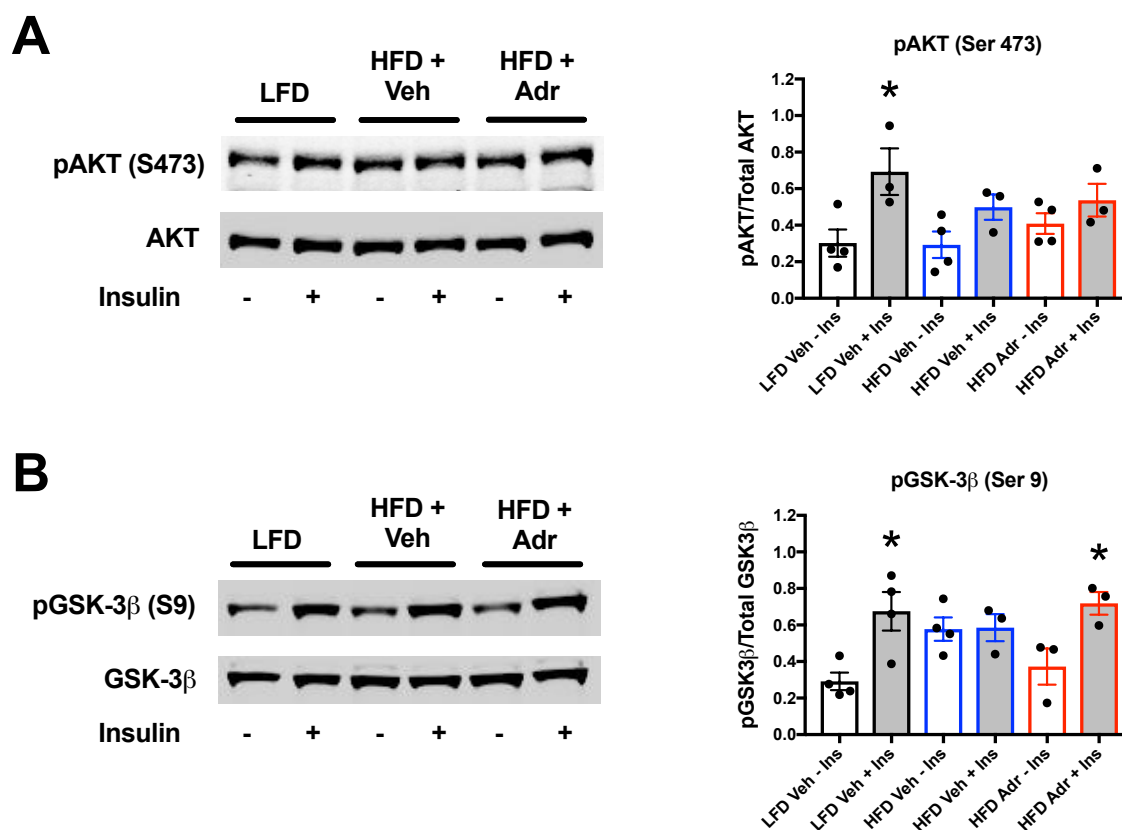

437

438

439 **Figure 5 – Acute adropin treatment moderately improves downstream**  
440 **insulin signaling in mouse hearts exposed to a high fat diet. (A-B)** Mice on a  
441 low fat diet (LFD) were responsive to insulin stimulation, as shown by  
442 phosphorylation of AKT at Ser 473. Conversely, both vehicle (Veh) and adropin  
443 (Adr) treated hearts did not shown significant changes in AKT phosphorylation  
444 after exposure to a high fat diet (HFD). The same pattern was observed in  
445 downstream AKT signaling (phosphorylation of GSK-3 $\beta$  at Ser 9) in vehicle-  
446 treated HFD mice after insulin stimulation. However, adropin treatment restored  
447 insulin-mediated GSK-3 $\beta$  phosphorylation in HFD mice under the same  
448 conditions. N = 3-4, \* =  $P < 0.05$  vs. LFD Veh group (One-way ANOVA with  
449 Dunnett's Post-Hoc Test).

450 **Figure 6**

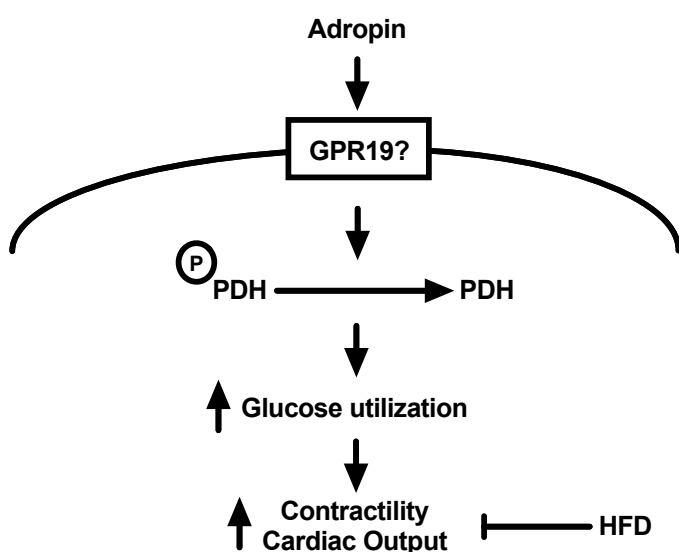

451

452

453 **Figure 6 – Model of acute adropin treatment on cardiac function in mice**

454 **exposed to a high fat diet.** Short-term adropin exposure, potentially signaling  
455 through the cell surface receptor GPR19, results in decreased inhibitory pyruvate  
456 dehydrogenase (PDH) phosphorylation and increased cardiomyocyte glucose  
457 utilization. In animals on a low fat diet, this leads to increased cardiac contractility  
458 and output, however the effect is lost after exposure to a long-term high fat diet  
459 (HFD).
